# Supplementary material for: Gene Set Enrichment Analysis (GSEA) of Differentially Expressed Genes in Green Tea against Methionine-Choline Deficient Diet in High-Fat Patients in the Development of Non-Alcoholic Fatty Liver Disease (NAFLD)
Source: Preprints.org preprint supplement (doi:10.20944/preprints201806.0310.v2), 2018-09-29
Supplement: Supplementary file 1 [file supplementary]

## Sheet: Sheet1
ARCHS4 TFS Coexp
Index	Name	P-value	Adjusted p-value	Z-score	Combined score
1	KLF5_human_tf_ARCHS4_coexpression	9.508e-09	1e-05	-1.6	29.5
2	ATOH1_human_tf_ARCHS4_coexpression	7.873e-08	1.657e-05	-1.63	26.69
3	TBX10_human_tf_ARCHS4_coexpression	7.873e-08	1.657e-05	-1.62	26.43
4	CDX2_human_tf_ARCHS4_coexpression	7.873e-08	1.657e-05	-1.56	25.54
5	ISX_human_tf_ARCHS4_coexpression	7.873e-08	1.657e-05	-1.54	25.18
ARCHS4 Kinases Coexp
Index	Name	P-value	Adjusted p-value	Z-score	Combined score
1	STYK1_human_kinase_ARCHS4_coexpression	7.873e-08	2.708e-05	-1.69	27.67
2	MST1R_human_kinase_ARCHS4_coexpression	2.633e-05	0.004529	-1.63	17.17
3	EPHB3_human_kinase_ARCHS4_coexpression	0.00015	0.01032	-1.67	14.71
4	ERBB3_human_kinase_ARCHS4_coexpression	0.00015	0.01032	-1.67	14.7
5	PTK6_human_kinase_ARCHS4_coexpression	0.00015	0.01032	-1.64	14.43
